# Supplementary material for: Modulation of Post-Traumatic Immune Response Using the IL-1 Receptor Antagonist Anakinra for Improved Visual Outcomes
Source: PubMed Central journal article supplement (PMC7249480; doi:10.1089/neu.2019.6725), 2020-05-27
Supplement: Supp_Table1.pdf [file Supp_Table1.pdf]

## Supplementary Data

SUPPLEMENTARY TABLE 1. MICE UTILIZED IN EXPERIMENTS\*

### *Triple bTBI model validation*

| <i>Cohort number</i> | <i>Time point</i> | <i>Experiment</i>                    | <i>n per group</i> |
|----------------------|-------------------|--------------------------------------|--------------------|
| 1                    | 4 h               | RT-PCR: Retina                       | 8–11               |
|                      |                   | RT-PCR: Brain                        | 7–8                |
| 2                    | 24 h              | RT-PCR: Retina                       | 6                  |
|                      | 4 hr              | Immunohistochemistry                 |                    |
|                      | 24 hr             | IBA-1 (whole mount)                  | 5–6                |
|                      | 1 week            | GFAP (cross section and whole mount) | 3                  |

### *Anakinra study*

| <i>Cohort number</i> | <i>Time point</i>    | <i>Experiment</i>    | <i>n per group</i> |
|----------------------|----------------------|----------------------|--------------------|
| 3                    | Pre-blast and 5 week | PERG                 | 10–16              |
|                      |                      | OCT                  |                    |
|                      |                      | Optic nerve grading  | 10–12              |
|                      |                      | Immunohistochemistry |                    |
|                      |                      | IBA-1 (whole mount)  | 7–8                |
|                      |                      | GFAP (cross section) | 3                  |

\*All mice were aged 2–4 months and were C57BL/6J background.

RT-PCR, reverse transcription-polymerase chain reaction; IBA-1, ionized calcium binding adaptor molecule 1; GFAP, glial fibrillary acidic protein; PERG, pattern electroretinogram; OCT, optical coherence tomography,
